# Supplementary material for: Comparative analysis reveals distinctive epigenetic features of the human cerebellum
Source: PLoS Genet. 2021 May 6;17(5):e1009506. doi: 10.1371/journal.pgen.1009506 (PMC8101944; doi:10.1371/journal.pgen.1009506)
Supplement: S2 Table — (XLSX) [file pgen.1009506.s006.xlsx]

## Sheet: Table S2
Table S2. Species and region-specific DMRs
DMR	Region	Species	CHR	start	end	features*	Hyper or hypo	nCpGs	overlap_other_structure	overlap_blood	genes
DMR_1	DLPFC	Human	4	174427146	174432425	IGR	hyper	23	FALSE	FALSE
DMR_2	DLPFC	Human	3	122640625	122641316	Body	hypo	7	FALSE	TRUE	SEMA5B
DMR_3	DLPFC	Human	8	105379392	105380480	IGR	hyper	6	FALSE	FALSE
DMR_4	DLPFC	Human	7	157808983	157809846	Body	hyper	8	FALSE	FALSE	PTPRN2
DMR_5	DLPFC	Human	16	3016378	3019192	TSS1500, TSS200, Body, 3'UTR	hyper	16	FALSE	FALSE	PAQR4,KREMEN2
DMR_6	DLPFC	Human	3	123339334	123339918	TSS200, TSS1500, 1stExon	hypo	5	FALSE	FALSE	MYLK
DMR_7	DLPFC	Human	2	27529325	27531967	3'UTR, TSS200, Body, 5'UTR, TSS1500	hyper	18	FALSE	TRUE	UCN,TRIM54
DMR_8	DLPFC	Human	1	120438925	120440129	TSS1500, TSS200, 1stExon, 5'UTR	mix	12	FALSE	FALSE	ADAM30
DMR_9	DLPFC	Human	15	83680015	83681092	TSS1500, Body	hypo	6	TRUE	TRUE	C15orf40
DMR_10	DLPFC	Human	8	80803196	80803954	IGR	hyper	5	FALSE	FALSE
DMR_11	DLPFC	Human	7	34118464	34118935	Body	hyper	5	TRUE	TRUE	BMPER
DMR_12	DLPFC	Human	2	72079276	72079609	IGR	hypo	7	FALSE	TRUE
DMR_13	DLPFC	Human	16	2255396	2256512	TSS200, Body, 5'UTR	hypo	7	FALSE	FALSE	MLST8
DMR_14	DLPFC	Human	1	40098595	40099015	Body	hyper	5	TRUE	FALSE	HEYL
DMR_15	DLPFC	Human	2	120435458	120437157	TSS200, 1stExon, TSS1500	hyper	6	FALSE	FALSE	TMEM177
DMR_16	DLPFC	Human	8	145754561	145755974	TSS1500, TSS200, Body	hyper	7	TRUE	FALSE	MGC70857,KIAA1688
DMR_17	DLPFC	Human	1	223565773	223567002	1stExon, TSS1500, TSS200	hyper	8	TRUE	TRUE	C1orf65
DMR_18	DLPFC	Human	17	73892982	73894017	TSS1500, 1stExon	hyper	5	FALSE	FALSE	TRIM65
DMR_19	DLPFC	Human	12	54763081	54764265	3'UTR, Body	hyper	5	TRUE	TRUE	ZNF385A
DMR_20	DLPFC	Human	3	46759335	46759977	TSS200, TSS1500, 1stExon	hypo	7	TRUE	FALSE	PRSS50
DMR_21	DLPFC	Human	5	38445301	38445834	TSS1500, Body, TSS200	hyper	5	TRUE	FALSE	EGFLAM
DMR_22	DLPFC	Human	17	49021472	49022278	IGR	hyper	5	FALSE	FALSE
DMR_23	DLPFC	Human	1	197889163	197890812	Body	hyper	5	FALSE	FALSE	LHX9
DMR_24	DLPFC	Human	10	50506748	50507214	TSS200, TSS1500, 5'UTR	hyper	6	FALSE	FALSE	C10orf71,C10orf71-AS1
DMR_25	DLPFC	Human	10	99734081	99734912	Body	hyper	5	FALSE	TRUE	CRTAC1
DMR_26	DLPFC	Human	4	2627014	2627142	TSS200	hypo	5	FALSE	FALSE	FAM193A
DMR_27	DLPFC	Human	7	135412196	135413232	TSS1500, 5'UTR, 1stExon, TSS200	hyper	5	FALSE	FALSE	SLC13A4
DMR_28	DLPFC	Human	1	19110734	19111089	IGR	hypo	5	FALSE	FALSE
DMR_1C	DLPFC	Chimp	19	34310911	34311562	IGR	hyper	5	FALSE	FALSE
DMR_2C	DLPFC	Chimp	1	29101609	29102519	IGR	hyper	6	FALSE	FALSE
DMR_3C	DLPFC	Chimp	13	47125801	47127418	TSS1500, 5'UTR	hyper	9	FALSE	FALSE	LRCH1
DMR_4C	DLPFC	Chimp	1	3649250	3649771	Body, 3'UTR	hyper	5	TRUE	TRUE	TP73
DMR_5C	DLPFC	Chimp	11	47574185	47575283	TSS1500, 5'UTR, 1stExon	hyper	5	FALSE	FALSE	CELF1,CUGBP1
DMR_1	Cerebellum	Human	3	194116724	194120023	Body, TSS200, 5'UTR, 3'UTR	hyper	14	FALSE	FALSE	GP5
DMR_2	Cerebellum	Human	17	48544724	48547268	TSS1500, Body, TSS200	hypo	18	FALSE	FALSE	CHAD,ACSF2
DMR_3	Cerebellum	Human	5	42811952	42812512	TSS1500, 1stExon	hyper	6	FALSE	FALSE	SEPP1
DMR_4	Cerebellum	Human	13	51416639	51419169	Body, TSS1500, TSS200, 1stExon	hyper	14	FALSE	FALSE	DLEU7
DMR_5	Cerebellum	Human	8	30412943	30414307	Body	hypo	5	FALSE	FALSE	RBPMS
DMR_6	Cerebellum	Human	1	234907722	234908514	IGR	hypo	5	FALSE	FALSE
DMR_7	Cerebellum	Human	11	61334385	61335600	Body	hyper	6	FALSE	FALSE	SYT7
DMR_8	Cerebellum	Human	10	105420501	105421558	Body	hypo	7	FALSE	FALSE	SH3PXD2A
DMR_9	Cerebellum	Human	3	11178285	11178798	TSS200, TSS1500, 5'UTR	hyper	6	FALSE	FALSE	HRH1
DMR_10	Cerebellum	Human	2	45170322	45172265	Body, 3'UTR	hyper	9	FALSE	FALSE	SIX3
DMR_11	Cerebellum	Human	3	124839483	124840638	Body	hypo	6	FALSE	FALSE	SLC12A8
DMR_12	Cerebellum	Human	12	53452144	53454300	Body	hypo	6	FALSE	FALSE	TNS2/TENC1
DMR_13	Cerebellum	Human	16	54970504	54973128	IGR	hypo	15	FALSE	FALSE
DMR_14	Cerebellum	Human	19	45898849	45900241	Body	hypo	5	FALSE	FALSE	PPP1R13L
DMR_15	Cerebellum	Human	22	44568203	44568812	TSS200, TSS1500	hypo	7	FALSE	FALSE	PARVG
DMR_16	Cerebellum	Human	6	111926749	111928080	1stExon, TSS1500, Body	hypo	6	FALSE	FALSE	TRAF3IP2
DMR_17	Cerebellum	Human	11	133236122	133236244	Body	hypo	5	FALSE	FALSE	OPCML
DMR_18	Cerebellum	Human	21	40823279	40824019	5'UTR, TSS200, 1stExon	hyper	6	FALSE	FALSE	SH3BGR
DMR_19	Cerebellum	Human	8	124193684	124195435	TSS1500, 5'UTR, 1stExon	hypo	17	FALSE	FALSE	FAM83A
DMR_20	Cerebellum	Human	12	99548301	99549790	TSS200, 1stExon, TSS1500	hypo	11	FALSE	FALSE	ANKS1B
DMR_21	Cerebellum	Human	19	51170017	51172755	Body	hyper	11	FALSE	FALSE	SHANK1
DMR_22	Cerebellum	Human	18	3593715	3594398	Body, TSS200, TSS1500	hypo	10	FALSE	FALSE	DLGAP1,DLGAP1-AS1/FLJ35776
DMR_23	Cerebellum	Human	5	72528111	72530472	IGR	hyper	10	FALSE	FALSE
DMR_24	Cerebellum	Human	5	150051412	150052349	Body	hypo	6	FALSE	FALSE	MYOZ3
DMR_25	Cerebellum	Human	15	83680015	83681092	TSS1500, Body	hypo	6	TRUE	TRUE	C15orf40
DMR_26	Cerebellum	Human	14	74823886	74824804	Body	hyper	7	FALSE	FALSE	C14orf115
DMR_27	Cerebellum	Human	3	155394118	155394655	TSS1500, 5'UTR	hypo	5	FALSE	FALSE	PLCH1
DMR_28	Cerebellum	Human	4	174447847	174448841	3'UTR, Body	hyper	7	FALSE	FALSE	HAND2
DMR_29	Cerebellum	Human	8	145754561	145755974	TSS1500, TSS200, Body	hyper	7	TRUE	FALSE	MGC70857,KIAA1688
DMR_30	Cerebellum	Human	12	57613173	57614182	Body	hypo	6	FALSE	FALSE	NXPH4
DMR_31	Cerebellum	Human	4	159091358	159092553	Body, 5'UTR	hypo	7	FALSE	FALSE	FAM198B
DMR_32	Cerebellum	Human	17	1373774	1375968	Body, ExonBnd	hypo	6	FALSE	FALSE	MYO1C
DMR_33	Cerebellum	Human	16	54404408	54404959	IGR	hyper	8	FALSE	FALSE
DMR_34	Cerebellum	Human	10	103070480	103071320	IGR	hypo	6	FALSE	FALSE
DMR_35	Cerebellum	Human	6	111888446	111888870	TSS1500, Body	hypo	6	FALSE	FALSE	TRAF3IP2
DMR_36	Cerebellum	Human	11	8615356	8616721	TSS1500, TSS200, 1stExon	hypo	6	FALSE	FALSE	STK33
DMR_37	Cerebellum	Human	12	54763081	54764265	3'UTR, Body	hyper	5	TRUE	TRUE	ZNF385A
DMR_38	Cerebellum	Human	19	46915570	46917727	1stExon, TSS200, TSS1500	hypo	11	FALSE	FALSE	CCDC8
DMR_39	Cerebellum	Human	10	106034472	106034917	5'UTR, TSS200	hypo	5	FALSE	FALSE	GSTO2
DMR_40	Cerebellum	Human	4	183061840	183063637	Body	hyper	6	FALSE	FALSE	MGC45800
DMR_41	Cerebellum	Human	11	115529573	115531171	IGR	mix (mostly hyper)	9	FALSE	FALSE
DMR_42	Cerebellum	Human	6	43276478	43277151	1stExon, TSS1500, Body	mix (mostly hypo)	5	FALSE	FALSE	CRIP3
DMR_43	Cerebellum	Human	14	24540025	24541377	5'UTR, TSS1500	hypo	6	FALSE	FALSE	CPNE6
DMR_44	Cerebellum	Human	6	12716580	12718370	TSS1500, TSS200, 5'UTR	hypo	7	FALSE	FALSE	PHACTR1
DMR_45	Cerebellum	Human	11	94277451	94278595	1stExon	hypo	6	FALSE	FALSE	FUT4
DMR_46	Cerebellum	Human	7	34118464	34118935	Body	hyper	5	TRUE	TRUE	BMPER
DMR_47	Cerebellum	Human	13	31479935	31480942	Body, TSS200, TSS1500, 1stExon	mix (mostly hyper)	5	FALSE	FALSE	C13orf33,MEDAG
DMR_48	Cerebellum	Human	11	64658622	64659065	TSS1500, Body, TSS200	hypo	7	FALSE	FALSE	MIR192,MIR194-2
DMR_49	Cerebellum	Human	5	38445301	38445834	TSS1500, Body, TSS200	hyper	5	TRUE	FALSE	EGFLAM
DMR_50	Cerebellum	Human	1	231155632	231155862	TSS200, Body	hyper	6	FALSE	FALSE	MIR1182,FAM89A
DMR_51	Cerebellum	Human	12	124246917	124247047	1stExon, TSS200	hyper	5	FALSE	FALSE	DNAH10
DMR_52	Cerebellum	Human	3	46759335	46759977	TSS200, TSS1500, 1stExon	hypo	7	TRUE	FALSE	PRSS50
DMR_53	Cerebellum	Human	16	82044788	82045599	TSS200, 5'UTR, TSS1500	hyper	5	FALSE	FALSE	SDR42E1
DMR_54	Cerebellum	Human	3	50357171	50357676	Body	hypo	5	FALSE	FALSE	HYAL2
DMR_55	Cerebellum	Human	1	40098595	40099015	Body	hyper	5	TRUE	FALSE	HEYL
DMR_56	Cerebellum	Human	10	530714	531098	Body	hypo	5	FALSE	FALSE	DIP2C
DMR_57	Cerebellum	Human	2	66809119	66811157	IGR	hypo	5	FALSE	FALSE
DMR_58	Cerebellum	Human	11	65190198	65191944	Body, TSS200	hypo	5	FALSE	TRUE	NEAT1
DMR_59	Cerebellum	Human	16	31487153	31489209	3'UTR, Body	hyper	5	FALSE	FALSE	TGFB1I1
DMR_60	Cerebellum	Human	7	29923435	29924165	Body	hypo	5	FALSE	FALSE	WIPF3
DMR_61	Cerebellum	Human	1	223565773	223567002	1stExon, TSS1500, TSS200	hyper	8	TRUE	TRUE	C1orf65
DMR_62	Cerebellum	Human	10	10504287	10504825	Body, TSS200, TSS1500	hypo	5	FALSE	FALSE	LOC101928322
DMR_63	Cerebellum	Human	19	46282571	46283561	TSS200, Body, 1stExon	hyper	7	FALSE	FALSE	DMPK
DMR_64	Cerebellum	Human	12	2800182	2801061	3'UTR, Body	hyper	9	FALSE	FALSE	CACNA1C
DMR_1C	Cerebellum	Chimp	5	4511554	4512554	IGR	hyper	7	FALSE	FALSE
DMR_2C	Cerebellum	Chimp	2	223166435	223171105	3'UTR, 5'UTR, IGR, Body	hyper	26	FALSE	FALSE	CCDC140
DMR_3C	Cerebellum	Chimp	12	57594690	57597238	Body	hyper	11	FALSE	FALSE	LRP1
DMR_4C	Cerebellum	Chimp	17	4801878	4807065	Body, 1stExon, TSS200, TSS1500, 3'UTR	hyper	25	FALSE	TRUE	CHRNE,C17orf107
DMR_5C	Cerebellum	Chimp	4	113441608	113442804	IGR	hyper	8	FALSE	FALSE
DMR_6C	Cerebellum	Chimp	1	3027471	3028910	Body	hyper	5	FALSE	FALSE	PRDM16
DMR_7C	Cerebellum	Chimp	16	57562120	57563395	Body, 5'UTR	hyper	5	FALSE	FALSE	CCDC102A
DMR_8C	Cerebellum	Chimp	8	145104971	145107857	Body, IGR	hyper	10	FALSE	FALSE	OPLAH
DMR_9C	Cerebellum	Chimp	19	2289682	2291785	Body, 5'UTR, 3'UTR, IGR	hypo	13	FALSE	FALSE	LINGO3
DMR_10C	Cerebellum	Chimp	5	124080227	124081950	TSS1500, 1stExon	hyper	9	FALSE	FALSE	ZNF608
DMR_11C	Cerebellum	Chimp	17	27493204	27494295	Body, 5'UTR	hypo	6	FALSE	FALSE	MYO18A
DMR_12C	Cerebellum	Chimp	2	202671158	202672802	Body, 5'UTR, TSS200	hypo	7	FALSE	FALSE	CDK15
DMR_13C	Cerebellum	Chimp	11	8680189	8681335	TSS200, 5'UTR, TSS1500	hyper	6	FALSE	FALSE	TRIM66
DMR_14C	Cerebellum	Chimp	9	139436171	139438290	Body	hyper	6	FALSE	FALSE	NOTCH1
DMR_15C	Cerebellum	Chimp	11	102139342	102139781	IGR	hyper	5	FALSE	FALSE
DMR_16C	Cerebellum	Chimp	11	57193487	57194498	5'UTR, Body	hypo	9	FALSE	FALSE	SLC43A3
DMR_17C	Cerebellum	Chimp	10	77165167	77167715	Body	hypo	8	FALSE	FALSE	C10orf41,ZNF503-AS2
DMR_18C	Cerebellum	Chimp	15	31774078	31775895	3'UTR, IGR, Body	hypo	5	FALSE	FALSE	OTUD7A
DMR_19C	Cerebellum	Chimp	8	38964297	38965492	TSS1500, 1stExon, Body, TSS200	hypo	14	FALSE	FALSE	ADAM32
DMR_20C	Cerebellum	Chimp	1	27667340	27669932	TSS1500, 1stExon, TSS200, 5'UTR	hyper	11	FALSE	FALSE	SYTL1
DMR_21C	Cerebellum	Chimp	15	100537304	100538898	Body, ExonBnd	hypo	7	FALSE	FALSE	ADAMTS17
DMR_22C	Cerebellum	Chimp	6	134210159	134211217	1stExon, TSS200, Body	hyper	8	FALSE	FALSE	TCF21
DMR_23C	Cerebellum	Chimp	15	83951663	83954150	TSS1500, Body	hyper	12	FALSE	FALSE	BNC1
DMR_24C	Cerebellum	Chimp	2	241512404	241514526	Body, ExonBnd, 5'UTR	hypo	7	FALSE	FALSE	RNPEPL1
DMR_25C	Cerebellum	Chimp	11	84634126	84634409	1stExon	hyper	5	FALSE	TRUE	DLG2
DMR_26C	Cerebellum	Chimp	12	105626937	105628843	Body, TSS200, 5'UTR	hyper	5	FALSE	FALSE	APPL2
DMR_27C	Cerebellum	Chimp	2	127412692	127413936	TSS200, TSS1500, Body	hyper	7	FALSE	FALSE	GYPC
DMR_28C	Cerebellum	Chimp	11	113295287	113295526	5'UTR, Body	hypo	5	FALSE	FALSE	DRD2
DMR_29C	Cerebellum	Chimp	13	99629970	99630505	Body	hypo	5	FALSE	FALSE	DOCK9
DMR_30C	Cerebellum	Chimp	10	72200612	72201943	1stExon, TSS1500, TSS200, Body	hyper	7	FALSE	FALSE	NODAL
DMR_31C	Cerebellum	Chimp	8	134584241	134585500	TSS1500, TSS200	hyper	5	FALSE	FALSE	ST3GAL1
DMR_32C	Cerebellum	Chimp	1	90308431	90309998	5'UTR	hyper	5	FALSE	FALSE	LRRC8D
DMR_33C	Cerebellum	Chimp	2	239755461	239756128	TSS1500	hyper	5	FALSE	FALSE	TWIST2
DMR_34C	Cerebellum	Chimp	15	34260433	34261172	Body, TSS1500, TSS200	hypo	6	FALSE	FALSE	AVEN,CHRM5
DMR_35C	Cerebellum	Chimp	1	3649250	3649771	Body, 3'UTR	hyper	5	TRUE	TRUE	TP73
DMR_36C	Cerebellum	Chimp	2	223184510	223185665	IGR	hyper	6	FALSE	FALSE
DMR_37C	Cerebellum	Chimp	14	101923218	101924186	IGR	hyper	6	FALSE	FALSE
DMR_38C	Cerebellum	Chimp	16	29888096	29889509	Body	hyper	6	FALSE	FALSE	SEZ6L2
DMR_39C	Cerebellum	Chimp	8	19796299	19796772	TSS1500, 5'UTR, TSS200	hypo	6	FALSE	FALSE	LPL
DMR_40C	Cerebellum	Chimp	11	74178749	74178800	TSS200, TSS1500	hyper	5	FALSE	FALSE	KCNE3
*IGR = intergenic region, TSS1500 = within 1500 bp of transcription state site, TSS200 = within 200 bp of transcription state site
